# Supplementary material for: Multi-technique structural characterization of glass foams with complex pore structures obtained through phase separation
Source: Royal Society of Chemistry journal article supplement (doi:10.1039/d1qm00383f), 2021-01-01
Supplement: d1qm00383f4.pdf [file d1qm00383f4.pdf]

**Supplementary Information:**

Multi-technique Structural Characterization of Glass Foams with Complex Pore Structures  
Obtained through Phase Separation

Cristine S de Oliveira<sup>1</sup>, Richard Kohns<sup>2</sup>, Felix Meyerhöfer<sup>2</sup>, Simon Carstens<sup>2</sup>, Dirk Enke<sup>2</sup>, Ralf B Wehrspohn<sup>1</sup>, J Martins de Souza e Silva<sup>1,3,\*</sup>

<sup>1</sup> Institute of Physics, Martin Luther University Halle-Wittenberg, Halle, Germany

<sup>2</sup> Institute of Chemical Technology, Universität Leipzig, Leipzig, Germany

<sup>3</sup> Fraunhofer Institute for Microstructure of Materials and Systems IMWS, Halle (Saale), Germany

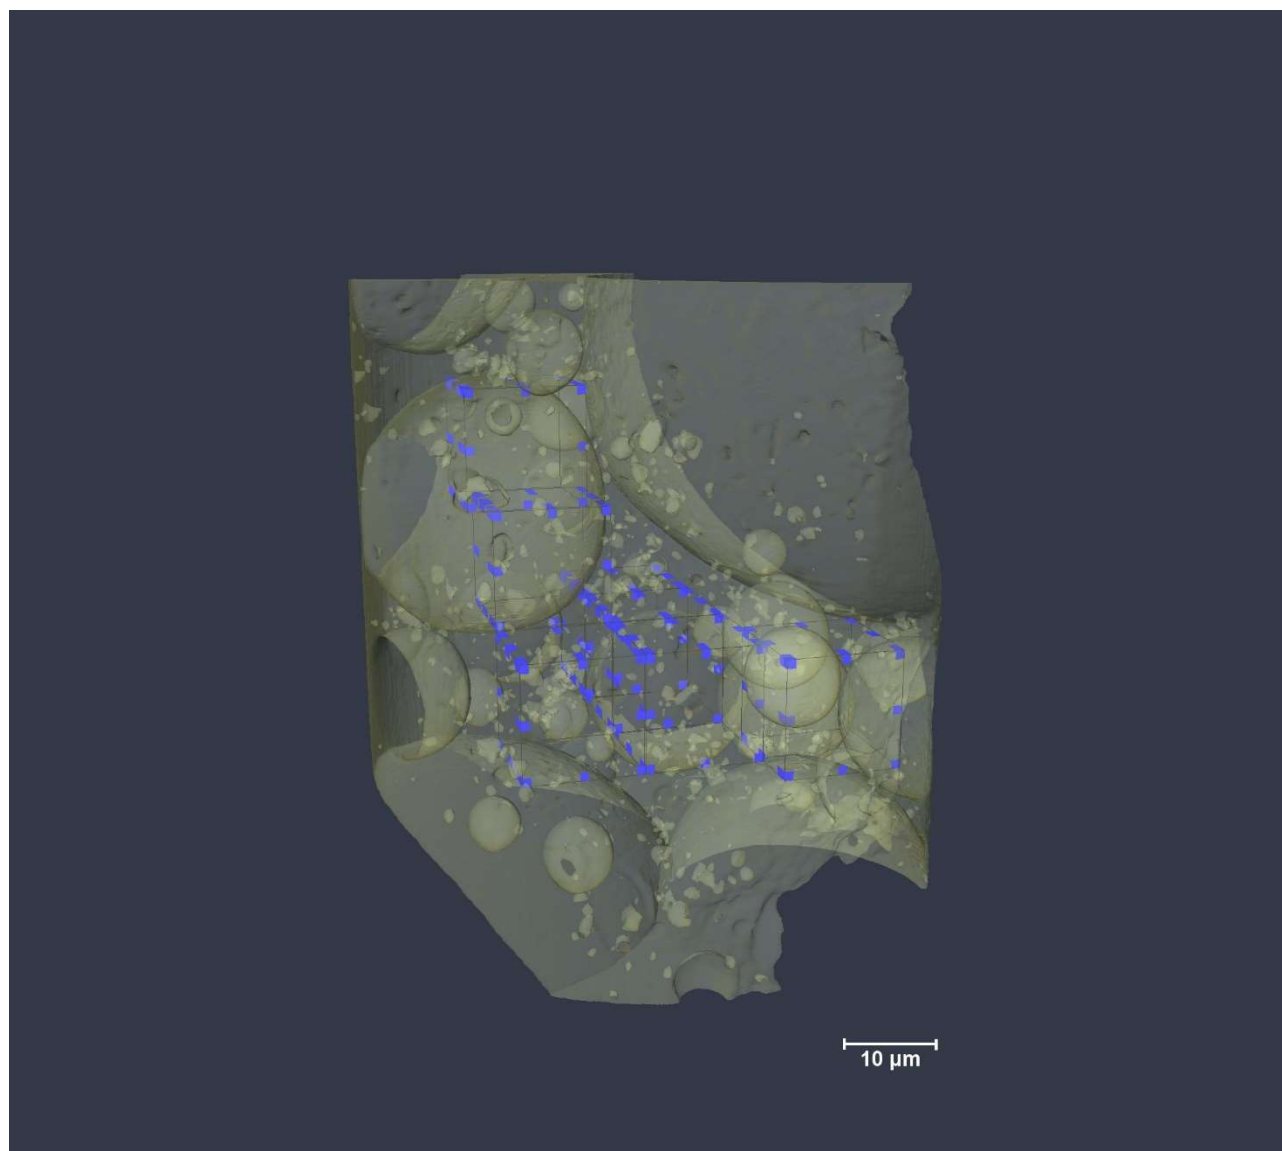

**Figure S1.** Region of interest extracted for the determination of porosity for nanoCT measurements of sample GF1.

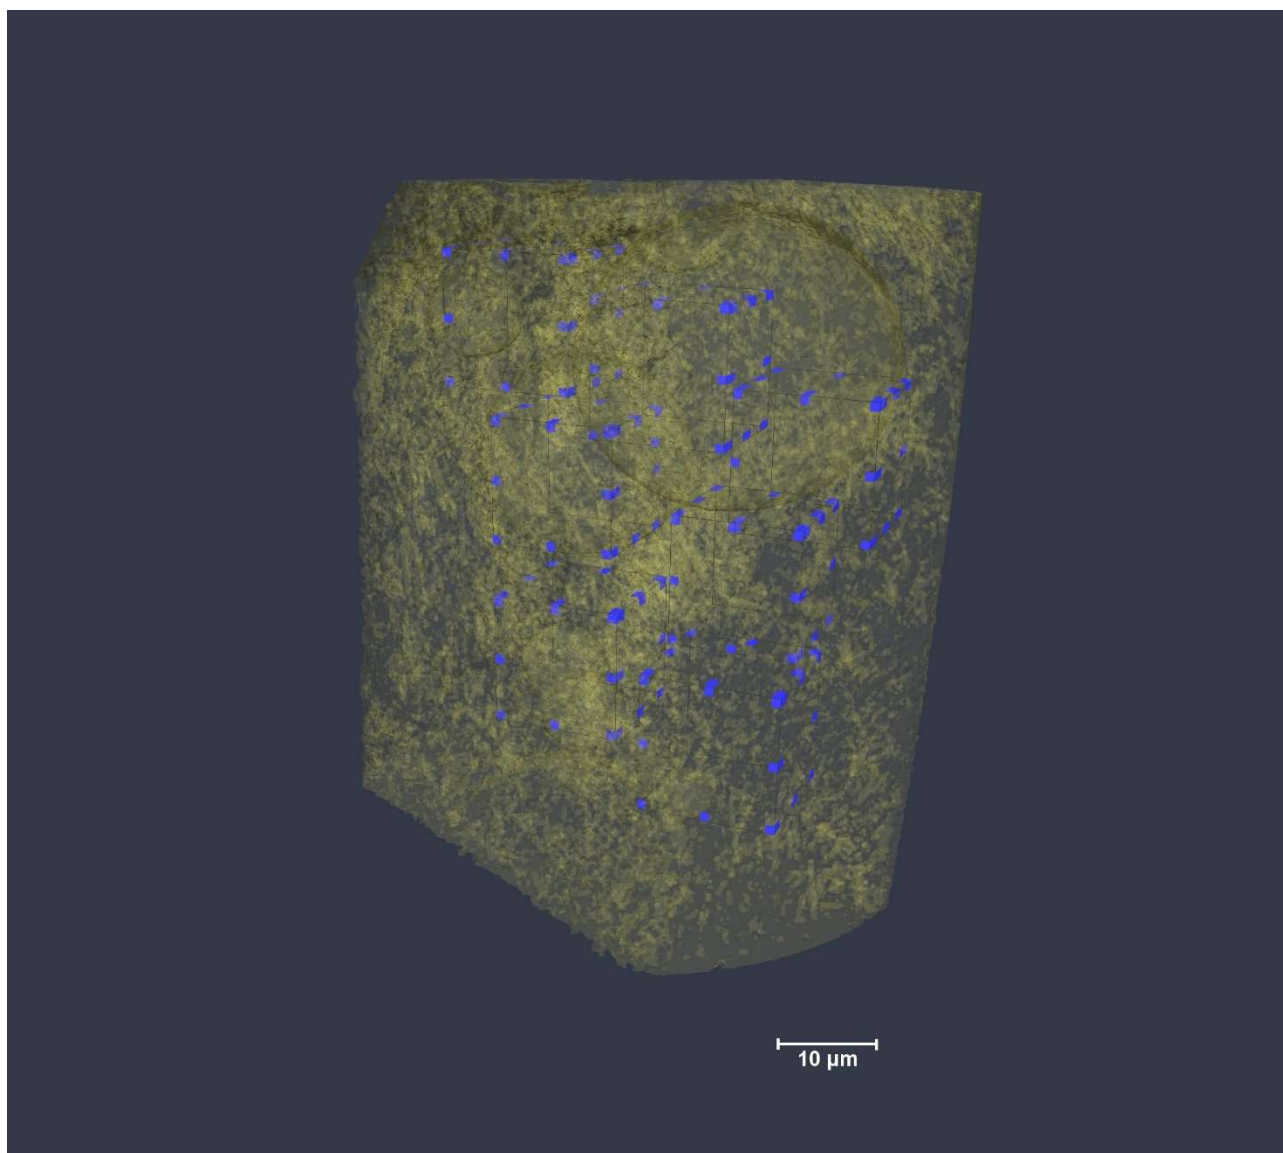

**Figure S2.** Region of interest extracted for the determination of porosity for nanoCT measurements of sample GF2.

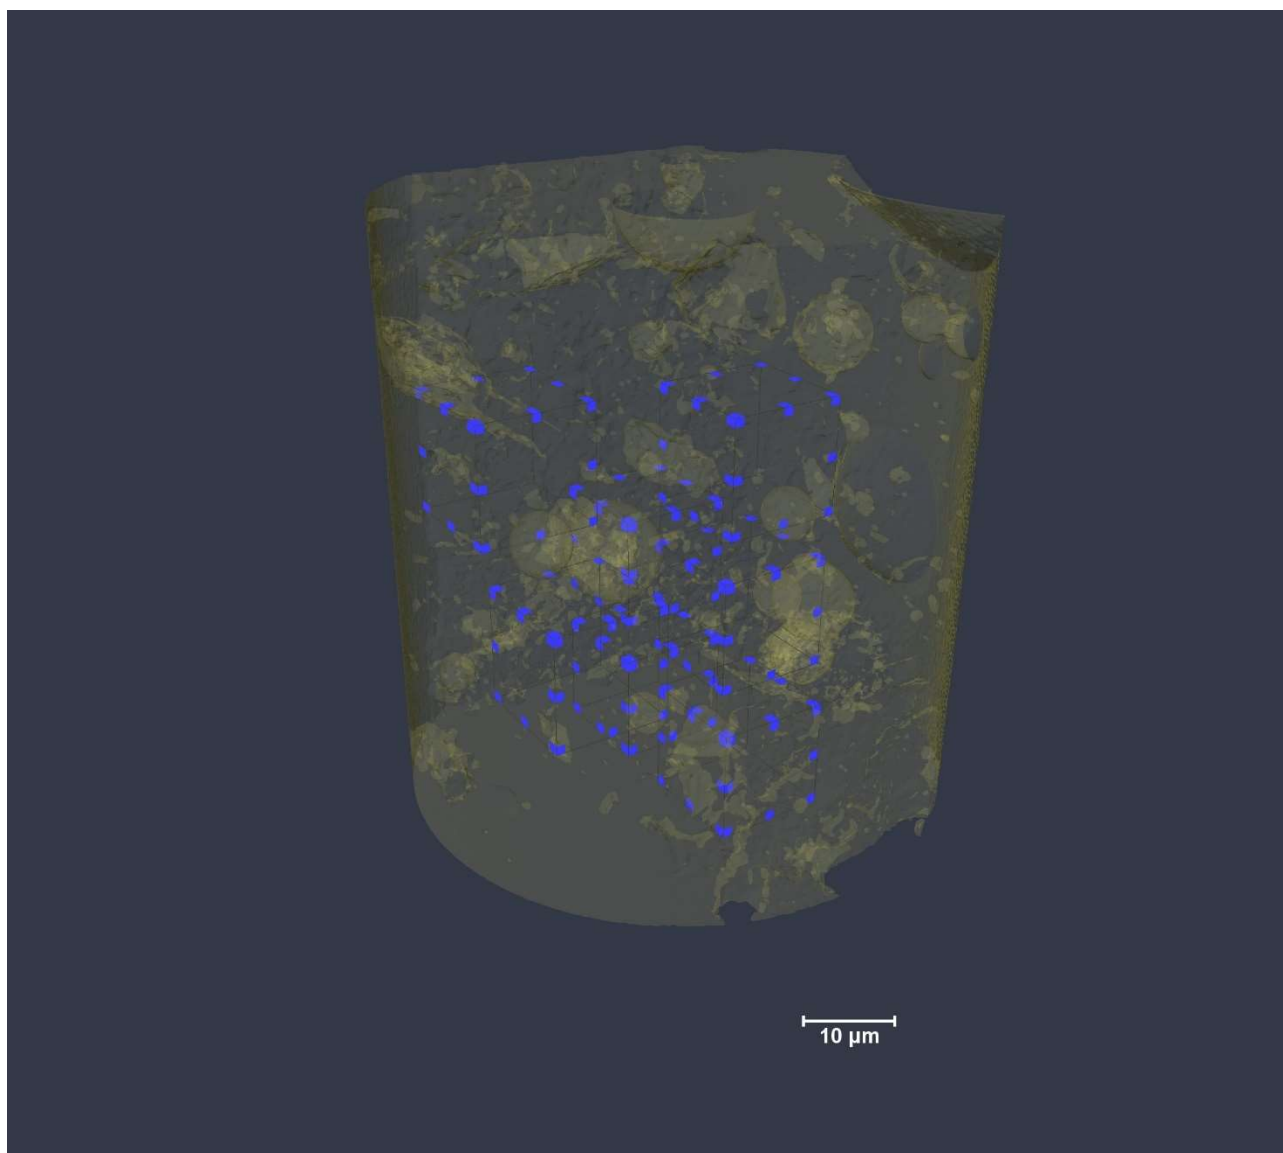

**Figure S3.** Region of interest extracted for the determination of porosity for nanoCT measurements of sample GF3.

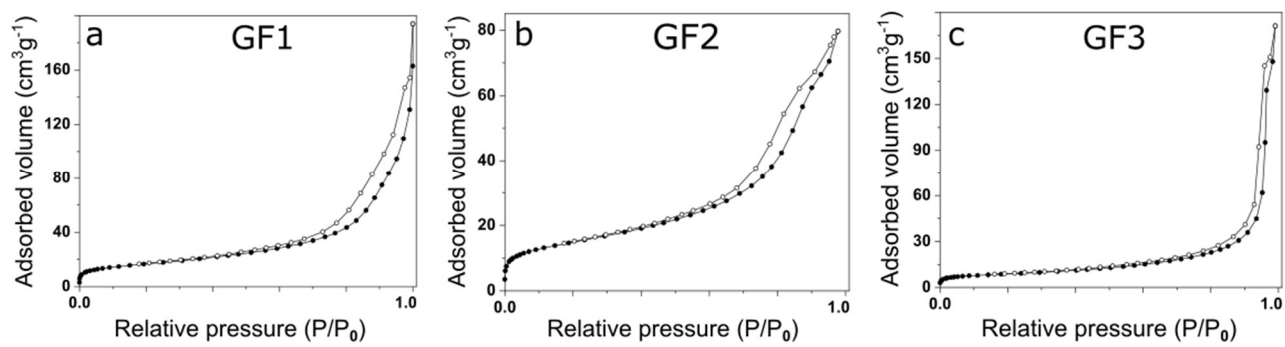

**Figure S4.** N<sub>2</sub> sorption isotherms of samples (a) GF1, (b) GF2 and (b) GF3.

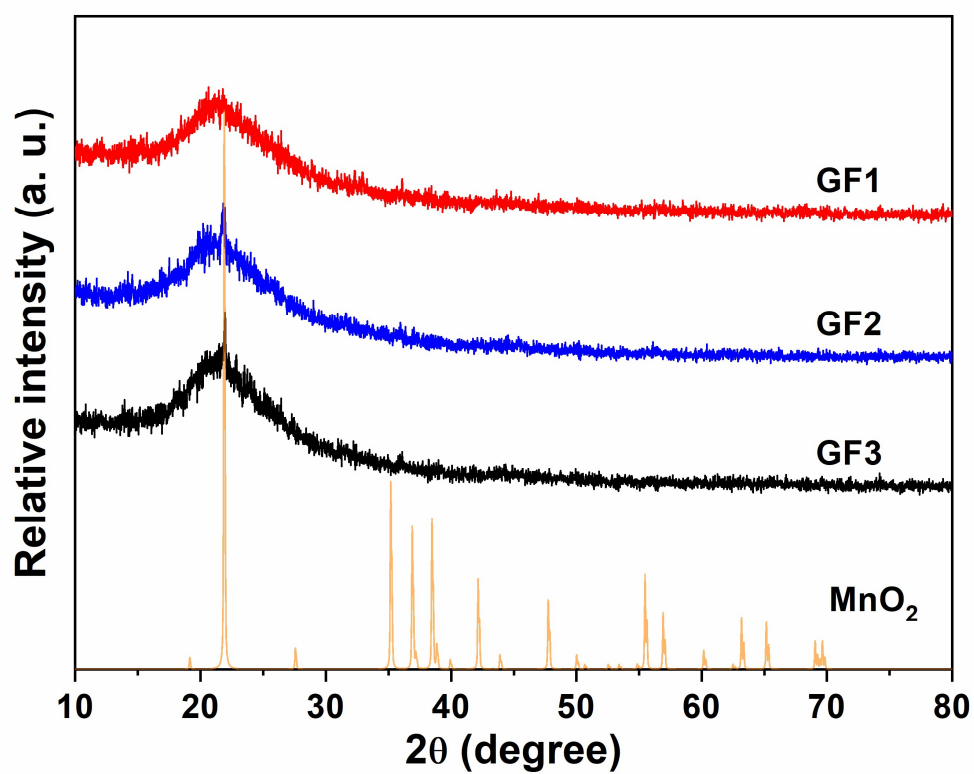

**Figure S5.** XRD profiles obtained for samples GF1, GF2 and GF3 and standard JCPDS 43-1455 for  $\text{MnO}_2$ .

**Movie S1.** Sequence of tomograms of sample GF1.

**Movie S2.** Sequence of tomograms of sample GF2.

**Movie S3.** Sequence of tomograms of sample GF3.
